# Supplementary material
Source: PubMed Central journal article supplement (PMC9733966)
Supplement: mmc1.pdf [file mmc1.pdf]

## **Supplementary Appendix - CanLoCAN Investigators**

The following investigators (grouped by centre) were investigators in the Canadian Long COVID Autonomic Network (CanLoCAN):

University of Calgary, Calgary, AB, Canada

- Hyeqa Ahmad
- Sakina Ambreen
- Luciano M Ayala Valani
- Jacquie R. Baker PhD
- Kate M. Bourne BSc
- Jeff F Dunn PhD
- Rashmin Hira BA BSc
- Kavithra Karalasingham
- Matthew G. Lloyd PhD
- Vibhuti Mavai
- Carlos A. Morillo MD
- Satish R. Raj MD MSCI
- Shaun I. Ranada BSc
- Robert S. Sheldon MD PhD
- Tanya Siddiqui MBBS MPhil
- Ateyeh Soroush BSc

McMaster University, Hamilton, ON, Canada

- Juan C Guzman MD MSc

Simon Fraser University, Burnaby, BC, Canada

- Victoria Claydon PhD MSc

University of Lethbridge, Lethbridge, AB, Canada

- Mary Runté PhD

Université de Sherbrooke, Sherbrooke, QC, Canada

- Felix A Ayala-Paredes MD

University of Toronto, University Health Network, Toronto, ON, Canada

- John Floras MD DPhil

University of Toronto, Women's College Hospital, Toronto, ON, Canada

- Paula Harvey MD PhD
- Oluwatosin Osuntokun MD

**Supplemental Table S1.** Autonomic Symptom Prevalence in Patients with PASC, overall cohort and with and without HCAA

| <b>General PASC Symptoms</b>       |                          |                                               |                                                  |                |
|------------------------------------|--------------------------|-----------------------------------------------|--------------------------------------------------|----------------|
| <b>General PASC Symptom</b>        | <b>Overall (n=70, %)</b> | <b>Patients with PASC with HCAA (n=51, %)</b> | <b>Patients with PASC without HCAA (n=19, %)</b> | <b>p-value</b> |
| Confusion/difficulty concentrating | 55 (79%)                 | 39 (77%)                                      | 16 (84%)                                         | 0.483          |
| Vision problems                    | 28 (40%)                 | 17 (35%)                                      | 11 (56%)                                         | 0.081          |
| Ringing in ear                     | 31 (44%)                 | 22 (44%)                                      | 9 (47%)                                          | 0.802          |
| Problems speaking/communicating    | 31 (44%)                 | 25 (49%)                                      | 6 (32%)                                          | 0.191          |
| Problems swallowing/chewing        | 8 (11%)                  | 6 (12%)                                       | 2 (11%)                                          | 0.844          |
| Weight loss                        | 12 (17%)                 | 9 (18%)                                       | 3 (16%)                                          | 0.829          |
| Loss of appetite                   | 23 (33%)                 | 17 (34%)                                      | 6 (33%)                                          | 0.959          |
| Diarrhea                           | 16 (23%)                 | 14 (29%)                                      | 2 (11%)                                          | 0.127          |
| Stomach/abdominal pain             | 30 (43%)                 | 23 (46%)                                      | 7 (37%)                                          | 0.493          |
| Feeling sick/vomiting              | 27 (39%)                 | 21 (42%)                                      | 6 (32%)                                          | 0.428          |
| Problems with urination            | 10 (14%)                 | 7 (14%)                                       | 3 (16%)                                          | 0.850          |
| Loss/change in smell               | 25 (36%)                 | 18 (37%)                                      | 7 (37%)                                          | 0.993          |
| Pain on breathing                  | 21 (30%)                 | 16 (32%)                                      | 5 (28%)                                          | 0.740          |
| Persistent cough                   | 21 (30%)                 | 17 (34%)                                      | 4 (21%)                                          | 0.296          |
| Chest pains                        | 38 (54%)                 | 26 (51%)                                      | 12 (63%)                                         | 0.363          |
| Persistent muscle pain             | 40 (57%)                 | 30 (60%)                                      | 10 (53%)                                         | 0.580          |

|                                      |          |          |          |       |
|--------------------------------------|----------|----------|----------|-------|
| Joint pain/swelling                  | 37 (53%) | 27 (55%) | 10 (53%) | 0.854 |
| Can't fully move or control movement | 6 (9%)   | 5 (10%)  | 1 (5%)   | 0.505 |
| Can't feel one side of body or face  | 5 (7%)   | 3 (6%)   | 2 (11%)  | 0.491 |
| Tingling feeling (pins and needles)  | 40 (57%) | 25 (51%) | 15 (83%) | 0.017 |
| Erectile dysfunction                 | 2 (3%)   | 2 (4%)   | 0 (0%)   | 0.371 |
| Changes in menstruation              | 12 (17%) | 8 (17%)  | 4 (21%)  | 0.673 |
| Problems with balance                | 33 (47%) | 24 (48%) | 9 (47%)  | 0.963 |
| Muscle weakness                      | 41 (59%) | 30 (60%) | 11 (58%) | 0.874 |
| Fainting/blackouts                   | 7 (10%)  | 5 (10%)  | 2 (11%)  | 0.969 |
| Seizures/fits                        | 1 (1.4%) | 1 (2%)   | 0 (0%)   | 0.526 |
| Tremor/shakiness                     | 28 (40%) | 22 (46%) | 6 (32%)  | 0.286 |
| Swollen ankles                       | 13 (19%) | 9 (18%)  | 4 (21%)  | 0.772 |
| Lumps/rashes on toes                 | 4 (6%)   | 2 (4%)   | 2 (11%)  | 0.311 |
| Skin rash                            | 13 (19%) | 10 (20%) | 3 (16%)  | 0.664 |
| Bleeding                             | 3 (4%)   | 1 (2%)   | 2 (11%)  | 0.126 |

Values are expressed as n (%). P-values were generated from Fischer's Exact test for categorical variables. HCAA – hemodynamic cardiovascular autonomic abnormalities; PASC – Post-Acute Sequelae of COVID-19.

**Supplemental Table S2.** Participant characteristics, hemodynamics, and symptoms in hospitalized vs. non-hospitalized patients with PASC

| <b>Characteristic</b>                                    | <b>Hospitalized Patients with PASC<br/>(n=9)</b> | <b>Non-Hospitalized Patients with<br/>PASC (n=61)</b> | <b>p-value</b> |
|----------------------------------------------------------|--------------------------------------------------|-------------------------------------------------------|----------------|
| Age, years                                               | 53 (41, 49)                                      | 41 (39, 46)                                           | 0.051          |
| Female                                                   | 6 (11%)                                          | 3 (21%)                                               | 0.284          |
| Height, cm                                               | 170 (160, 183)                                   | 168 (165, 170)                                        | 0.765          |
| Weight, kg                                               | 102 (90, 127)                                    | 75 (68, 82)                                           | 0.004          |
| BMI, kg/m <sup>2</sup>                                   | 34.3 (26.9, 51.5)                                | 26.6 (24.4, 28.1)                                     | 0.008          |
| BSA, m <sup>2</sup>                                      | 2.16 (2.01, 2.35)                                | 1.87 (1.78, 2.0)                                      | 0.005          |
| Race                                                     |                                                  |                                                       | 0.915          |
| Caucasians                                               | 9 (100%)                                         | 55 (90.2%)                                            |                |
| South Asians                                             | 0 (0%)                                           | 2 (3.3%)                                              |                |
| West Asians                                              | 0 (0%)                                           | 1 (1.6%)                                              |                |
| Indigenous Canadian                                      | 0 (0%)                                           | 1 (1.6%)                                              |                |
| ≥1 race                                                  | 0 (0%)                                           | 2 (3.3%)                                              |                |
| Duration since Initial<br>COVID infection, days          | 320 (272, 418)                                   | 421 (341, 465)                                        | 0.092          |
| <b>Autonomic Function Testing</b>                        |                                                  |                                                       |                |
| <b>Sympathetic Nerve Integrity (Total Sweat Volumes)</b> |                                                  |                                                       |                |
| Forearm, μL                                              | 1.25 (0.43, 1.47)                                | 0.49 (0.35, 0.64)                                     | 0.02           |
| Proximal leg, μL                                         | 0.38 (0.1, 1.04)                                 | 0.39 (0.31, 0.66)                                     | 0.888          |
| Distal leg, μL                                           | 0.77 (0.13, 1.67)                                | 0.48 (0.38, 0.61)                                     | 0.409          |
| Foot, μL                                                 | 0.48 (0.22, 1.93)                                | 0.41 (0.28, 0.55)                                     | 0.209          |
| <b>Cardiovagal function</b>                              |                                                  |                                                       |                |

|                                                  |                   |                   |       |
|--------------------------------------------------|-------------------|-------------------|-------|
| $\Delta\text{HR}_{\text{DB}}$ (bpm)              | 11 (9, 19)        | 16 (12, 18)       | 0.159 |
| VR                                               | 1.69 (1.38, 2.02) | 1.76 (1.67, 1.94) | 0.383 |
| <b>Composite Autonomic Severity Score (CASS)</b> |                   |                   |       |
| Overall CASS                                     | 2 (1, 3)          | 1 (1, 2)          | 0.342 |
| Sudomotor                                        | 0 (0, 0)          | 0 (0, 0)          | 0.277 |
| Cardiovagal                                      | 1 (0, 1)          | 0 (0, 0)          | 0.022 |
| Adrenergic                                       | 1 (1, 1)          | 1 (1, 1)          | 0.471 |
| <b>Autonomic Symptom Assessment</b>              |                   |                   |       |
| <b>COMPASS-31 Domains</b>                        |                   |                   |       |
| Orthostatic Intolerance                          | 16 (0, 32)        | 20 (16, 20)       | 0.425 |
| Vasomotor                                        | 0 (0, 4.17)       | 0 (0, 0)          | 0.612 |
| Secretomotor                                     | 4.29 (2.14, 8.57) | 6.43 (4.29, 6.43) | 0.823 |
| Gastrointestinal                                 | 7.14 (3.57, 14.3) | 8.04 (6.25, 9.82) | 0.455 |
| Bladder                                          | 1.11 (0, 3.33)    | 0 (0, 1.11)       | 0.105 |
| Pupillomotor                                     | 2.67 (1, 3.33)    | 2.33 (2.0, 2.67)  | 0.711 |
| Total                                            | 33 (18, 54)       | 37 (31, 40)       | 0.605 |
| <b>PASC Symptoms</b>                             |                   |                   |       |
| Light-headedness                                 | 6 (67%)           | 49 (80%)          | 0.351 |
| Shortness of breath                              | 7 (78%)           | 44 (73%)          | 0.777 |
| Palpitations                                     | 4 (44%)           | 45 (74%)          | 0.073 |
| Fatigue                                          | 8 (89%)           | 56 (92%)          | 0.771 |
| Headache                                         | 4 (44%)           | 37 (62%)          | 0.327 |

|                        |         |          |       |
|------------------------|---------|----------|-------|
| Loss/change in taste   | 3 (33%) | 18 (31%) | 0.864 |
| Constipation           | 2 (22%) | 18 (30%) | 0.632 |
| Problems with sleeping | 6 (75%) | 45 (75%) | 1.00  |

Values are expressed as Median (95% Confidence Interval [CI]). P-values were generated from Mann-Whitney U test for continuous variables and Fischer's Exact test for categorical variables. BMI – Body Mass Index; BSA – Body Surface Area; CASS – Composite Autonomic Severity Score; COMPASS-31 - Composite Autonomic Symptom Score;  $\Delta HR_{DB}$  – Delta HR in Deep Breathing; PASC – Post-Acute Sequelae of COVID-19; VR – Valsalva Ratio; HR – Heart Rate.
